# Supplementary material for: Genetic variation and selection in the major histocompatibility complex Class II gene in the Guizhou pony
Source: PeerJ. 2020 Sep 18;8:e9889. doi: 10.7717/peerj.9889 (PMC7505079; doi:10.7717/peerj.9889)
Supplement: Supplemental Information 2 [file peerj-08-9889-s002.xlsx]

## Sheet: Table S2
Table S2.Nucleotide Composition of DQA,DQB,DRA,DRB in Guizhou pony.
DQA	T(U)	A	G	C	Total
DQA1	27.1255	25.5061	24.6964	22.6721	247
DQA2	27.1255	25.9109	24.6964	22.2672	247
DQA3	27.5304	25.9109	24.2915	22.2672	247
DQA4	26.3158	25.1012	27.1255	21.4575	247
DQA5	27.1255	23.8866	27.1255	21.8623	247
DQA6	26.3158	23.8866	27.1255	22.6721	247
DQA7	27.1255	24.6964	26.7206	21.4575	247
DQA8	27.5304	25.9109	25.5061	21.0526	247
DQA9	25.5061	27.9352	21.4575	25.1012	247
DQA10	25.1012	25.9109	26.3158	22.6721	247
DQA11	28.4553	24.7967	23.9837	22.7642	246
DQA12	25.5061	26.7206	23.8866	23.8866	247
DQA13	25.9109	25.9109	24.6964	23.4818	247
DQA14	26.3158	25.9109	24.6964	23.0769	247
DQA15	25.1012	28.3401	21.8623	24.6964	247
DQA16	27.1255	24.2915	27.1255	21.4575	247
DQA17	26.8293	23.9837	26.0163	23.1707	246
DQA18	25.1012	24.6964	26.3158	23.8866	247
DQA19	24.6964	24.6964	26.7206	23.8866	247
DQA20	26.7206	25.5061	24.6964	23.0769	247
Avg.	26.4282	25.4755	25.253	22.8433	246.9
DQB	T(U)	A	G	C	Total
DQB1	14.7826	21.7391	35.6522	27.8261	230
DQB2	13.913	21.7391	36.5217	27.8261	230
DQB3	13.4783	20.8696	36.9565	28.6957	230
DQB4	14.5374	21.5859	36.5639	27.3128	227
DQB5	13.4783	22.1739	36.9565	27.3913	230
DQB6	15.6522	20	38.2609	26.087	230
DQB7	14.7826	21.3043	36.9565	26.9565	230
DQB8	13.4783	23.0435	36.087	27.3913	230
DQB9	12.6087	23.0435	35.6522	28.6957	230
DQB10	15.2174	21.7391	35.6522	27.3913	230
DQB11	16.5217	20	35.2174	28.2609	230
DQB12	13.0435	22.6087	35.6522	28.6957	230
DQB13	13.4783	20.8696	37.3913	28.2609	230
DQB14	14.7826	20.8696	35.2174	29.1304	230
DQB15	15.2174	21.3043	34.7826	28.6957	230
DQB16	13.4783	23.0435	36.5217	26.9565	230
DQB17	13.0435	20.8696	38.6957	27.3913	230
DQB18	12.6087	21.7391	37.8261	27.8261	230
DQB19	15.2174	20	37.8261	26.9565	230
DQB20	13.913	21.7391	36.9565	27.3913	230
DQB21	13.913	22.1739	36.5217	27.3913	230
DQB22	14.3478	21.7391	35.6522	28.2609	230
DQB23	14.7826	22.1739	35.2174	27.8261	230
DQB24	13.0435	22.6087	37.3913	26.9565	230
DQB25	15.6522	23.0435	35.6522	25.6522	230
DQB26	13.0435	21.7391	35.6522	29.5652	230
DQB27	14.7826	20.8696	35.2174	29.1304	230
DQB28	14.7826	21.7391	35.6522	27.8261	230
DQB29	14.7826	21.3043	36.087	27.8261	230
DQB30	14.7826	21.3043	36.087	27.8261	230
DQB31	15.2174	21.7391	35.6522	27.3913	230
DQB32	14.7826	22.1739	35.2174	27.8261	230
DQB33	15.2174	21.7391	35.2174	27.8261	230
DQB34	14.3478	21.3043	36.087	28.2609	230
DQB35	13.913	22.1739	36.5217	27.3913	230
DQB36	16.087	19.5652	35.6522	28.6957	230
DQB37	13.913	21.3043	36.9565	27.8261	230
DQB38	13.913	21.3043	36.9565	27.8261	230
DQB39	13.4783	22.6087	36.5217	27.3913	230
DQB40	13.913	20.4348	37.3913	28.2609	230
DQB41	13.0435	22.6087	35.6522	28.6957	230
DQB42	13.4783	21.7391	36.5217	28.2609	230
DQB43	13.0435	20.8696	37.8261	28.2609	230
DQB44	14.3478	21.3043	36.087	28.2609	230
DQB45	13.913	21.7391	34.7826	29.5652	230
Avg.	14.2167	21.5908	36.3004	27.8921	229.933
DRA	T(U)	A	G	C	Total
DRA1	25.6098	26.4228	28.0488	19.9187	246
DRA2	25.6098	26.8293	27.6423	19.9187	246
DRA3	25.6098	26.4228	28.0488	19.9187	246
DRA4	24.7967	26.8293	28.0488	20.3252	246
DRA5	26.0163	26.4228	27.6423	19.9187	246
DRA6	25.2033	26.4228	27.6423	20.7317	246
DRA7	25.6098	26.0163	28.4553	19.9187	246
DRA8	25.2033	26.4228	28.0488	20.3252	246
DRA9	25.6098	26.8293	28.0488	19.5122	246
DRA10	25.6098	27.2358	27.2358	19.9187	246
DRA11	25.6098	26.4228	28.0488	19.9187	246
DRA12	25.6098	27.2358	27.2358	19.9187	246
DRA13	25.6098	26.0163	28.4553	19.9187	246
DRA14	25.2033	26.4228	28.0488	20.3252	246
DRA15	25.2033	26.4228	28.0488	20.3252	246
DRA16	25.6098	26.0163	28.4553	19.9187	246
DRA17	25.2033	26.4228	28.0488	20.3252	246
DRA18	25.6098	26.0163	28.4553	19.9187	246
DRA19	25.2033	26.4228	28.0488	20.3252	246
DRA20	25.6098	26.0163	28.4553	19.9187	246
DRA21	25.2033	26.4228	28.0488	20.3252	246
DRA22	25.2033	26.4228	28.0488	20.3252	246
Avg.	25.4435	26.4597	28.0118	20.085	246
DRB	T(U)	A	G	C	Total
DRB1	17.029	22.8261	34.4203	25.7246	276
DRB2	17.7536	21.0145	34.4203	26.8116	276
DRB3	17.029	20.2899	36.2319	26.4493	276
DRB4	17.029	20.2899	35.8696	26.8116	276
DRB5	17.7536	20.6522	35.1449	26.4493	276
DRB6	17.7536	21.0145	34.4203	26.8116	276
DRB7	18.0077	23.3716	33.7165	24.9042	261
DRB8	17.029	21.3768	35.1449	26.4493	276
DRB9	18.8406	18.8406	36.5942	25.7246	276
DRB10	18.1159	21.3768	34.4203	26.087	276
DRB11	17.3913	19.9275	35.5072	27.1739	276
DRB12	17.029	20.6522	36.5942	25.7246	276
DRB13	18.4783	20.2899	34.4203	26.8116	276
DRB14	16.3043	20.2899	35.5072	27.8986	276
DRB15	17.029	19.5652	35.8696	27.5362	276
DRB16	19.2029	21.0145	34.058	25.7246	276
DRB17	18.8406	19.9275	35.5072	25.7246	276
DRB18	17.3913	19.2029	35.1449	28.2609	276
DRA19	17.029	20.2899	36.5942	26.087	276
DRB20	18.4783	19.2029	35.8696	26.4493	276
DRB21	17.7536	19.9275	36.2319	26.087	276
DRB22	17.029	20.6522	35.1449	27.1739	276
DRB23	17.029	20.2899	35.5072	27.1739	276
DRB24	17.029	20.6522	36.2319	26.087	276
DRB25	17.029	19.9275	36.5942	26.4493	276
DRB26	17.7536	20.6522	34.7826	26.8116	276
DRB27	17.7536	20.6522	34.7826	26.8116	276
DRB28	17.7536	21.0145	35.1449	26.087	276
DRB29	18.8406	18.4783	36.9565	25.7246	276
DRB30	17.029	20.6522	35.5072	26.8116	276
DRB31	16.3043	21.3768	36.5942	25.7246	276
Avg.	17.5741	20.5011	35.4525	26.4723	275.516
